# Supplementary material
Source: PubMed Central journal article supplement (PMC3302438)
Supplement: supp_32.7.1271_MCB-MCB05788-11-s01.pdf [file supp_32.7.1271_MCB-MCB05788-11-s01.pdf]

# Berg, et al Supplementary Information

## Supplemental Figure Legends

### **Figure S1. Anti-EJC monoclonal antibodies immunoprecipitate spliced mRNA**

Denaturing PAGE analysis for splicing of <sup>32</sup>P-labeled Ad2ΔIVS pre-mRNA (Input) followed by immunoprecipitations with Control (SP2/0), Y14 (4C4), eIF4AIII (3F1) and hnRNP C1/C2 (4F4) mouse monoclonal antibodies. Identities of splicing intermediates are depicted to the right of the gel.

### **Figure S2. Optimization of the EJIPT assay parameters**

(A) Splicing reactions with ATP (0.5 mM), without ATP, or with 5 mM AMP-PNP were immunoprecipitated with an anti-EJC antibody. SP2/0 is a control anti-mouse antibody substituted for the anti-EJC antibody. Ad2 mRNA produced without splicing was immunoprecipitated with an anti-EJC antibody. Parameters for the EJIPT assay were examined using increasing amounts of splicing extract (B) and increasing amounts of biotin-labeled Ad2ΔIVS pre-mRNA (C) in a 10 μl reaction volume.

### **Figure S3. NSC663284 and BN82685 are more selective splicing inhibitors compared to NSC95397**

*In vitro* snRNP assembly was performed in the presence of increasing amounts of compounds. Chemiluminescence signals are the averages of quadruplicate measurements. The red dashed line indicates the average for DMSO controls ( $6.0 \pm 1.1 \times 10^4$  RLU).

**Supplemental Table S1. Association of individual proteins with drug-treated spliceosomes.**

Peptide counts for mass spectrometry of DMSO and BN82685 streptavidin pull downs are shown for three independent experiments, along with a technical repeat of experiment 3. The ratio of BN82685 to DMSO is shown in dark grey columns and the average and standard deviation of the four data points is listed on the right in light grey columns. Data points not used in the calculation are in grey type with italics.

|                                                                       | Accession   |         | Molecular |         | Exp 1 |      | Exp 2   |       | Exp 3A |         | Exp 3B |      | Average | Std Dev |         |       |
|-----------------------------------------------------------------------|-------------|---------|-----------|---------|-------|------|---------|-------|--------|---------|--------|------|---------|---------|---------|-------|
|                                                                       | Number      | Weight  | DMSO      | BN82685 | ratio | DMSO | BN82685 | ratio | DMSO   | BN82685 | ratio  | DMSO |         |         | BN82685 | ratio |
| Top 200 Identified Proteins                                           |             |         |           |         |       |      |         |       |        |         |        |      |         |         |         |       |
| Isoform 1 of Acetyl-CoA carboxylase 1                                 | IPI0001569  | 266 kDa | 51        | 73      | 1.43  | 11   | 2       | 0.18  | 376    | 401     | 1.07   | 910  | 984     | 1.08    | 0.94    | 0.53  |
| Splicing factor 3B subunit 1                                          | IPI00026089 | 146 kDa | 188       | 175     | 0.93  | 305  | 231     | 0.76  | 137    | 114     | 0.83   | 307  | 204     | 0.66    | 0.80    | 0.11  |
| Dihydrodipolyllysine-residue acetyltransferase component              | IPI00021338 | 69 kDa  | 109       | 110     | 1.01  | 251  | 260     | 1.04  | 120    | 135     | 1.13   | 312  | 337     | 1.08    | 1.06    | 0.05  |
| Pre-mRNA-processing splicing factor 8                                 | IPI00007928 | 274 kDa | 170       | 143     | 0.84  | 232  | 106     | 0.46  | 174    | 188     | 1.08   | 200  | 213     | 1.07    | 0.86    | 0.29  |
| Isoform 1 of Splicing factor 3B subunit 3                             | IPI00300371 | 136 kDa | 104       | 105     | 1.01  | 199  | 169     | 0.85  | 118    | 96      | 0.81   | 246  | 196     | 0.80    | 0.87    | 0.10  |
| 116 kDa U5 small nuclear ribonucleoprotein component                  | IPI00003519 | 109 kDa | 132       | 99      | 0.75  | 203  | 122     | 0.60  | 94     | 98      | 1.04   | 196  | 218     | 1.11    | 0.88    | 0.24  |
| Lipoamide acyltransferase component                                   | IPI00003944 | 53 kDa  | 80        | 61      | 0.76  | 136  | 168     | 1.24  | 54     | 69      | 1.28   | 128  | 147     | 1.15    | 1.11    | 0.24  |
| Splicing factor 3A subunit 1                                          | IPI00017451 | 89 kDa  | 106       | 77      | 0.73  | 163  | 108     | 0.66  | 64     | 60      | 0.94   | 130  | 107     | 0.82    | 0.79    | 0.12  |
| Splicing factor 3B subunit 2                                          | IPI00221106 | 100 kDa | 82        | 70      | 0.85  | 95   | 98      | 1.03  | 78     | 60      | 0.77   | 162  | 108     | 0.67    | 0.83    | 0.15  |
| Isoform 1 of U5 small nuclear ribonucleoprotein 200 kDa helicase      | IPI00420014 | 245 kDa | 78        | 92      | 1.18  | 77   | 39      | 0.51  | 94     | 83      | 0.88   | 137  | 190     | 1.39    | 0.99    | 0.38  |
| U2 small nuclear ribonucleoprotein A'                                 | IPI00297477 | 28 kDa  | 58        | 48      | 0.83  | 92   | 82      | 0.89  | 48     | 40      | 0.83   | 149  | 129     | 0.87    | 0.85    | 0.03  |
| Isoform 2 of U5 small nuclear ribonucleoprotein 200 kDa helicase      | IPI00168235 | 71 kDa  | 80        | 56      | 0.70  | 73   | 38      | 0.52  | 55     | 60      | 1.09   | 74   | 91      | 1.23    | 0.89    | 0.33  |
| Putative uncharacterized protein ALB                                  | IPI00022434 | 72 kDa  | 40        | 34      | 0.85  | 62   | 76      | 1.23  | 43     | 46      | 1.07   | 109  | 107     | 0.98    | 1.03    | 0.16  |
| Isoform 2 of Splicing factor 3B subunit 3                             | IPI00179138 | 30 kDa  | 46        | 31      | 0.67  | 69   | 65      | 0.94  | 28     | 30      | 1.07   | 85   | 85      | 1.00    | 0.92    | 0.17  |
| Isoform 1 of Polyadenylate-binding protein 1                          | IPI00008524 | 71 kDa  | 48        | 45      | 0.94  | 25   | 40      | 1.60  | 46     | 62      | 1.35   | 124  | 102     | 0.82    | 1.18    | 0.36  |
| Cell division cycle 5-like protein                                    | IPI00465294 | 92 kDa  | 51        | 58      | 1.14  | 61   | 34      | 0.56  | 40     | 50      | 1.25   | 70   | 90      | 1.29    | 1.06    | 0.34  |
| Intron-binding protein aquarius                                       | IPI00297572 | 171 kDa | 53        | 51      | 0.96  | 42   | 23      | 0.55  | 54     | 52      | 0.96   | 40   | 69      | 1.73    | 1.05    | 0.49  |
| Isoform Long of Splicing factor, proline- and glutamine-rich          | IPI00010740 | 76 kDa  | 5         | 8       | 1.60  | 0    | 1       | n/a   | 74     | 64      | 0.86   | 237  | 80      | 0.34    | 0.93    | 0.63  |
| Keratin, type II cytoskeletal 1                                       | IPI00220327 | 66 kDa  | 52        | 95      | 1.83  | 39   | 57      | 1.46  | 37     | 42      | 1.14   | 49   | 75      | 1.53    | 1.49    | 0.28  |
| Splicing factor 3A subunit 3                                          | IPI00029764 | 59 kDa  | 47        | 45      | 0.96  | 80   | 50      | 0.63  | 39     | 22      | 0.56   | 73   | 47      | 0.64    | 0.70    | 0.18  |
| Isoform 1 of Heterogeneous nuclear ribonucleoprotein M                | IPI00171903 | 78 kDa  | 53        | 49      | 0.92  | 30   | 34      | 1.13  | 77     | 53      | 0.69   | 72   | 73      | 1.01    | 0.94    | 0.19  |
| Pre-mRNA-processing factor 19                                         | IPI00004968 | 55 kDa  | 35        | 43      | 1.23  | 80   | 53      | 0.66  | 32     | 42      | 1.31   | 71   | 96      | 1.35    | 1.14    | 0.32  |
| Pyruvate carboxylase, mitochondrial                                   | IPI00299402 | 130 kDa | 18        | 27      | 1.50  | 5    | 3       | 0.60  | 78     | 75      | 0.96   | 109  | 89      | 0.82    | 0.97    | 0.38  |
| Pre-mRNA-splicing factor SYF1                                         | IPI00163084 | 100 kDa | 62        | 63      | 1.02  | 50   | 23      | 0.46  | 39     | 63      | 1.62   | 45   | 59      | 1.31    | 1.10    | 0.49  |
| Pyruvate dehydrogenase protein X component, mitochondrial             | IPI00298423 | 54 kDa  | 51        | 31      | 0.61  | 43   | 72      | 1.67  | 34     | 58      | 1.71   | 61   | 52      | 0.85    | 1.21    | 0.56  |
| Isoform 1 of Crooked neck-like protein 1                              | IPI00177437 | 100 kDa | 55        | 39      | 0.71  | 48   | 24      | 0.50  | 30     | 49      | 1.63   | 41   | 63      | 1.54    | 1.09    | 0.57  |
| Keratin, type I cytoskeletal 10                                       | IPI00009865 | 59 kDa  | 66        | 74      | 1.12  | 23   | 40      | 1.74  | 44     | 39      | 0.89   | 22   | 26      | 1.18    | 1.23    | 0.36  |
| Insulin-like growth factor 2 mRNA-binding protein 1                   | IPI00008557 | 63 kDa  | 33        | 43      | 1.30  | 22   | 28      | 1.27  | 44     | 32      | 0.73   | 81   | 60      | 0.74    | 1.01    | 0.32  |
| Propionyl-CoA carboxylase beta chain, mitochondrial                   | IPI00007247 | 58 kDa  | 25        | 13      | 0.52  | 17   | 10      | 0.59  | 48     | 47      | 0.98   | 95   | 89      | 0.94    | 0.76    | 0.24  |
| Non-POU domain-containing octamer-binding protein                     | IPI00304596 | 54 kDa  | 0         | 1       | n/a   | 0    | 0       | 0.00  | 66     | 50      | 0.76   | 147  | 48      | 0.33    | 0.36    | 0.38  |
| propionyl-CoA carboxylase alpha chain                                 | IPI00552419 | 75 kDa  | 22        | 13      | 0.59  | 11   | 9       | 0.82  | 47     | 58      | 1.23   | 71   | 80      | 1.13    | 0.94    | 0.29  |
| Methylcrotonyl-CoA carboxylase subunit alpha, mitochondrial           | IPI00024580 | 80 kDa  | 4         | 2       | 0.50  | 0    | 0       | 0.00  | 69     | 78      | 1.13   | 68   | 82      | 1.21    | 0.71    | 0.57  |
| SM-B' of Small nuclear ribonucleoprotein-associated proteins B and B' | IPI00027285 | 25 kDa  | 28        | 5       | 0.18  | 19   | 23      | 1.21  | 31     | 23      | 0.74   | 81   | 51      | 0.63    | 0.69    | 0.42  |
| Heterogeneous nuclear ribonucleoprotein U-like protein 1              | IPI00013070 | 96 kDa  | 21        | 12      | 0.57  | 8    | 2       | 0.25  | 40     | 36      | 0.90   | 80   | 32      | 0.40    | 0.53    | 0.28  |
| Keratin, type II cytoskeletal 2 epidermal                             | IPI00021304 | 66 kDa  | 36        | 49      | 1.36  | 24   | 38      | 1.58  | 21     | 16      | 0.76   | 31   | 33      | 1.06    | 1.19    | 0.36  |
| Eukaryotic initiation factor 4A-III                                   | IPI00009328 | 47 kDa  | 22        | 4       | 0.18  | 20   | 1       | 0.05  | 21     | 42      | 2.00   | 17   | 99      | 5.82    | 2.01    | 2.69  |
| SNW domain-containing protein 1                                       | IPI00013830 | 61 kDa  | 25        | 10      | 0.40  | 22   | 18      | 0.82  | 25     | 30      | 1.20   | 30   | 33      | 1.10    | 0.88    | 0.36  |
| Isoform 1 of Terminal uridylyltransferase 4                           | IPI00289861 | 185 kDa | 8         | 6       | 0.75  | 28   | 21      | 0.75  | 5      | 9       | 1.80   | 31   | 76      | 2.45    | 1.44    | 0.84  |
| cDNA FLJ56825, highly similar to WD repeat protein 57                 | IPI00006723 | 45 kDa  | 17        | 12      | 0.71  | 11   | 5       | 0.45  | 17     | 30      | 1.76   | 56   | 56      | 1.00    | 0.98    | 0.57  |
| Isoform 1 of Pleiotropic regulator 1                                  | IPI00002624 | 57 kDa  | 40        | 16      | 0.40  | 14   | 8       | 0.57  | 29     | 34      | 1.17   | 22   | 32      | 1.45    | 0.90    | 0.50  |
| Pre-mRNA-processing factor 17                                         | IPI00026307 | 66 kDa  | 28        | 22      | 0.79  | 10   | 7       | 0.70  | 28     | 33      | 1.18   | 22   | 30      | 1.36    | 1.01    | 0.32  |
| Tubulin alpha-4A chain                                                | IPI00007750 | 50 kDa  | 7         | 6       | 0.86  | 4    | 9       | 2.25  | 19     | 27      | 1.42   | 44   | 58      | 1.32    | 1.46    | 0.58  |
| Actin, cytoplasmic 1                                                  | IPI00021439 | 42 kDa  | 17        | 4       | 0.24  | 19   | 5       | 0.26  | 7      | 20      | 2.86   | 21   | 32      | 1.52    | 1.22    | 1.25  |
| Matrin-3                                                              | IPI00017297 | 95 kDa  | 4         | 15      | 3.75  | 0    | 0       | 0.00  | 42     | 35      | 0.83   | 52   | 28      | 0.54    | 1.28    | 1.68  |
| Tubulin beta-2C chain                                                 | IPI00007752 | 50 kDa  | 5         | 4       | 0.80  | 1    | 0       | 0.00  | 33     | 53      | 1.61   | 25   | 48      | 1.92    | 1.08    | 0.86  |
| Isoform 1 of RNA-binding protein 14                                   | IPI00013174 | 69 kDa  | 11        | 4       | 0.36  | 3    | 0       | 0.00  | 27     | 27      | 1.00   | 51   | 25      | 0.49    | 0.46    | 0.41  |
| Heterogeneous nuclear ribonucleoprotein C-like 1                      | IPI00027569 | 32 kDa  | 17        | 13      | 0.76  | 10   | 10      | 1.00  | 26     | 23      | 0.88   | 28   | 29      | 1.04    | 0.92    | 0.12  |
| Isoform C1 of Heterogeneous nuclear ribonucleoproteins C1/C2          | IPI00216592 | 32 kDa  | 13        | 5       | 0.38  | 10   | 11      | 1.10  | 20     | 22      | 1.10   | 40   | 19      | 0.48    | 0.76    | 0.39  |
| pyruvate dehydrogenase E1 alpha 1 isoform 2 precursor                 | IPI00306301 | 48 kDa  | 13        | 17      | 1.31  | 26   | 32      | 1.23  | 8      | 9       | 1.13   | 29   | 22      | 0.76    | 1.11    | 0.24  |
| Dihydrodipolyl dehydrogenase, mitochondrial                           | IPI00015911 | 54 kDa  | 27        | 17      | 0.63  | 14   | 20      | 1.43  | 12     | 14      | 1.17   | 21   | 28      | 1.33    | 1.14    | 0.36  |
| Isoform 1 of Pre-mRNA-splicing factor ISY1 homolog                    | IPI00063673 | 35 kDa  | 17        | 5       | 0.29  | 11   | 10      | 0.91  | 15     | 29      | 1.93   | 25   | 29      | 1.16    | 1.07    | 0.68  |
| Keratin, type I cytoskeletal 9                                        | IPI00019359 | 62 kDa  | 18        | 46      | 2.56  | 14   | 20      | 1.43  | 8      | 12      | 1.50   | 2    | 18      | 9.00    | 3.62    | 3.62  |
| Ribonuclease inhibitor                                                | IPI00550069 | 50 kDa  | 24        | 15      | 0.63  | 14   | 16      | 1.14  | 12     | 12      | 1.00   | 29   | 11      | 0.38    | 0.79    | 0.35  |
| PHD finger-like domain-containing protein 5A                          | IPI00005511 | 12 kDa  | 16        | 12      | 0.75  | 34   | 25      | 0.74  | 9      | 10      | 1.11   | 11   | 9       | 0.82    | 0.85    | 0.18  |
| Pyruvate dehydrogenase E1 component subunit beta, mitochondrial       | IPI00003925 | 39 kDa  | 23        | 13      | 0.57  | 12   | 16      | 1.33  | 9      | 16      | 1.78   | 8    | 7       | 0.88    | 1.14    | 0.53  |
| TUBA1C protein                                                        | IPI00166768 | 37 kDa  | 6         | 11      | 1.83  | 13   | 12      | 0.92  | 6      | 13      | 2.17   | 33   | 35      | 1.06    | 1.50    | 0.60  |
| Isoform 1 of Pre-mRNA-splicing factor RBM22                           | IPI00019046 | 47 kDa  | 11        | 6       | 0.55  | 6    | 4       | 0.67  | 12     | 22      | 1.83   | 6    | 20      | 3.33    | 1.59    | 1.30  |
| WD40 repeat-containing protein SMU1                                   | IPI00305833 | 58 kDa  | 25        | 8       | 0.32  | 5    | 3       | 0.60  | 11     | 21      | 1.91   | 19   | 19      | 1.00    | 0.96    | 0.69  |
| Beta-actin-like protein 2                                             | IPI00003269 | 42 kDa  | 14        | 4       | 0.29  | 20   | 9       | 0.45  | 6      | 15      | 2.50   | 20   | 22      | 1.10    | 1.08    | 1.01  |
| Putative uncharacterized protein FUBP3                                | IPI00063245 | 35 kDa  | 14        | 9       | 0.64  | 5    | 13      | 2.60  | 20     | 18      | 0.90   | 18   | 7       | 0.39    | 1.13    | 1.00  |
| Vimentin                                                              | IPI00418471 | 54 kDa  | 18        | 13      | 0.72  | 3    | 6       | 2.00  | 15     | 21      | 1.40   | 8    | 19      | 2.38    | 1.62    | 0.72  |
| Actin, aortic smooth muscle                                           | IPI00008603 | 42 kDa  | 5         | 3       | 0.60  | 19   | 8       | 0.42  | 6      | 15      | 2.50   | 19   | 30      | 1.58    | 1.28    | 0.96  |
| cDNA FLJ55034                                                         | IPI00384122 | 40 kDa  | 15        | 18      | 1.20  | 24   | 25      | 1.04  | 7      | 1       | 0.14   | 10   | 6       | 0.60    | 0.75    | 0.48  |
| U2 small nuclear ribonucleoprotein B''                                | IPI00029267 | 25 kDa  | 12        | 9       | 0.75  | 1    | 7       | 7.00  | 14     | 11      | 0.79   | 27   | 28      | 1.04    | 0.86    | 0.16  |
| Isoform A of Peptidyl-prolyl cis-trans isomerase E                    | IPI00009316 | 33 kDa  | 11        | 2       | 0.18  | 6    | 4       | 0.67  | 19     | 16      | 0.84   | 29   | 23      | 0.79    | 0.62    | 0.30  |
| KH-type splicing regulatory protein                                   | IPI00479786 | 73 kDa  | 14        | 23      | 1.64  | 1    | 11      | 11.00 | 23     | 8       | 0.35   | 11   | 1       | 0.09    | 0.69    | 0.83  |
| Isoform 1 of Paraspeckle component 1                                  | IPI00103525 | 59 kDa  | 1         | 0       | 0.00  | 0    | 0       | 0.00  | 31     | 19      | 0.61   | 42   | 13      | 0.31    | 0.46    | 0.21  |
| SF3A2 protein (Fragment)                                              | IPI00017341 | 51 kDa  | 12        | 11      | 0.92  | 5    | 13      | 2.60  | 12     | 13      | 1.08   | 15   | 19      | 1.27    | 1.47    | 0.77  |
| cDNA FLJ60076, highly similar to ELAV-like protein 1                  | IPI00301936 | 39 kDa  | 9         | 9       | 1.00  | 3    | 5       | 1.67  | 22     | 10      | 0.45   | 28   | 22      | 0.79    | 0.98    | 0.51  |

**Table S1.** Peptide counts for top proteins (1-69) detected by mass spectrometry of DMSO and BN82685 streptavid

|                                                                             | Accession   |         | Molecular |         | Exp 1 |      | Exp 2   |       | Exp 3A |         | Exp 3B |      | Average | Std Dev |         |       |
|-----------------------------------------------------------------------------|-------------|---------|-----------|---------|-------|------|---------|-------|--------|---------|--------|------|---------|---------|---------|-------|
|                                                                             | Number      | Weight  | DMSO      | BN82685 | ratio | DMSO | BN82685 | ratio | DMSO   | BN82685 | ratio  | DMSO |         |         | BN82685 | ratio |
| Top 200 Identified Proteins                                                 |             |         |           |         |       |      |         |       |        |         |        |      |         |         |         |       |
| Pre-mRNA branch site protein p14                                            | IPI00032827 | 15 kDa  | 14        | 21      | 1.50  | 26   | 17      | 0.65  | 6      | 7       | 1.17   | 3    | 2       | 0.67    | 1.00    | 0.41  |
| Pre-mRNA-splicing factor SPF27                                              | IPI00025178 | 26 kDa  | 7         | 9       | 1.29  | 9    | 7       | 0.78  | 10     | 12      | 1.20   | 22   | 16      | 0.73    | 1.00    | 0.29  |
| Coiled-coil domain-containing protein 12                                    | IPI00453463 | 19 kDa  | 11        | 14      | 1.27  | 10   | 7       | 0.70  | 14     | 11      | 0.79   | 13   | 10      | 0.77    | 0.88    | 0.26  |
| Tubulin, beta                                                               | IPI00645452 | 48 kDa  | 3         | 4       | 1.33  | 1    | 1       | 1.00  | 6      | 12      | 2.00   | 33   | 42      | 1.27    | 1.40    | 0.42  |
| U1 small nuclear ribonucleoprotein A                                        | IPI00012382 | 31 kDa  | 9         | 6       | 0.67  | 12   | 11      | 0.92  | 8      | 12      | 1.50   | 18   | 17      | 0.94    | 1.01    | 0.35  |
| Pre-mRNA-processing factor 6                                                | IPI00305068 | 107 kDa | 19        | 9       | 0.47  | 21   | 2       | 0.10  | 6      | 8       | 1.33   | 11   | 4       | 0.36    | 0.31    | 0.19  |
| Isoform 2 of RNA-binding motif, single-stranded interacting protein 1       | IPI00033611 | 44 kDa  | 5         | 3       | 0.60  | 10   | 9       | 0.90  | 12     | 12      | 1.00   | 25   | 20      | 0.80    | 0.83    | 0.17  |
| Isoform 1 of RNA-binding protein 4                                          | IPI00003704 | 40 kDa  | 12        | 4       | 0.33  | 1    | 0       | 0.00  | 7      | 12      | 1.71   | 30   | 23      | 0.77    | 0.94    | 0.71  |
| Isoform 1 of Insulin-like growth factor 2 mRNA-binding protein 3            | IPI00658000 | 64 kDa  | 6         | 7       | 1.17  | 0    | 0       | 0.00  | 16     | 18      | 1.13   | 22   | 18      | 0.82    | 1.04    | 0.19  |
| Isoform 2 of Double-stranded RNA-specific adenosine deaminase               | IPI00025057 | 133 kDa | 5         | 8       | 1.60  | 0    | 0       | 0.00  | 24     | 25      | 1.04   | 8    | 15      | 1.88    | 1.51    | 0.42  |
| Peptidyl-prolyl cis-trans isomerase-like 1                                  | IPI00007019 | 18 kDa  | 19        | 10      | 0.53  | 12   | 3       | 0.25  | 14     | 4       | 0.29   | 7    | 2       | 0.29    | 0.34    | 0.13  |
| Heterogeneous nuclear ribonucleoprotein H                                   | IPI00013881 | 49 kDa  | 10        | 14      | 1.40  | 3    | 4       | 1.33  | 13     | 12      | 0.92   | 18   | 8       | 0.44    | 1.03    | 0.44  |
| Trypsin-1                                                                   | IPI00011694 | 27 kDa  | 10        | 12      | 1.20  | 10   | 13      | 1.30  | 3      | 3       | 1.00   | 3    | 24      | 8.00    | 1.17    | 0.15  |
| Isoform 1 of Polyadenylate-binding protein 4                                | IPI00012726 | 71 kDa  | 13        | 6       | 0.46  | 4    | 3       | 0.75  | 16     | 8       | 0.50   | 14   | 8       | 0.57    | 0.57    | 0.13  |
| 60S acidic ribosomal protein P0                                             | IPI00008530 | 34 kDa  | 3         | 3       | 1.00  | 1    | 0       | 0.00  | 18     | 15      | 0.83   | 28   | 12      | 0.43    | 0.75    | 0.29  |
| Small nuclear ribonucleoprotein Sm D3                                       | IPI00017964 | 14 kDa  | 7         | 5       | 0.71  | 14   | 16      | 1.14  | 4      | 3       | 0.75   | 8    | 9       | 1.13    | 0.93    | 0.23  |
| Small nuclear ribonucleoprotein Sm D1                                       | IPI00302850 | 13 kDa  | 16        | 16      | 1.00  | 7    | 8       | 1.14  | 5      | 4       | 0.80   | 13   | 11      | 0.85    | 0.95    | 0.16  |
| Protein CWC15 homolog                                                       | IPI00009009 | 27 kDa  | 9         | 4       | 0.44  | 2    | 3       | 1.50  | 11     | 12      | 1.09   | 12   | 8       | 0.67    | 0.93    | 0.47  |
| cDNA FLJ77422                                                               | IPI00011268 | 33 kDa  | 4         | 2       | 0.50  | 0    | 1       | 0.00  | 10     | 7       | 0.70   | 13   | 10      | 0.77    | 0.66    | 0.14  |
| Isoform 1 of Protein lin-28 homolog B                                       | IPI00398131 | 27 kDa  | 2         | 1       | 0.50  | 1    | 0       | 0.00  | 16     | 9       | 0.56   | 27   | 12      | 0.44    | 0.50    | 0.06  |
| Small nuclear ribonucleoprotein Sm D2                                       | IPI00017963 | 14 kDa  | 11        | 9       | 0.82  | 12   | 8       | 0.67  | 7      | 7       | 1.00   | 8    | 9       | 1.13    | 0.90    | 0.20  |
| Isoform 1 of Heterogeneous nuclear ribonucleoprotein K                      | IPI00216049 | 51 kDa  | 5         | 11      | 2.20  | 0    | 3       | n/a   | 15     | 8       | 0.53   | 21   | 6       | 0.29    | 1.01    | 1.04  |
| Heterogeneous nuclear ribonucleoprotein F                                   | IPI00003881 | 46 kDa  | 6         | 13      | 2.17  | 0    | 3       | n/a   | 12     | 9       | 0.75   | 11   | 10      | 0.91    | 1.28    | 0.78  |
| Keratin, type II cytoskeletal 75                                            | IPI00005859 | 60 kDa  | 8         | 8       | 1.00  | 5    | 9       | 1.80  | 8      | 5       | 0.63   | 10   | 12      | 1.20    | 1.16    | 0.49  |
| DEAD (Asp-Glu-Ala-Asp) box polypeptide 39 transcript variant                | IPI00062206 | 35 kDa  | 1         | 4       | 4.00  | 0    | 2       | n/a   | 7      | 3       | 0.43   | 25   | 16      | 0.64    | 1.69    | 2.00  |
| Splicing factor 3B subunit 4                                                | IPI00017339 | 44 kDa  | 7         | 12      | 1.71  | 8    | 10      | 1.25  | 4      | 4       | 1.00   | 4    | 9       | 2.25    | 1.55    | 0.55  |
| ubiquitin and ribosomal protein S27a precursor                              | IPI00179330 | 18 kDa  | 5         | 8       | 1.60  | 2    | 9       | 4.50  | 5      | 12      | 2.40   | 9    | 7       | 0.78    | 2.32    | 1.60  |
| Small nuclear ribonucleoprotein E                                           | IPI00029266 | 11 kDa  | 13        | 13      | 1.00  | 9    | 7       | 0.78  | 6      | 7       | 1.17   | 2    | 1       | 0.50    | 0.86    | 0.29  |
| 60S ribosomal protein L7                                                    | IPI00030179 | 29 kDa  | 2         | 1       | 0.50  | 0    | 2       | n/a   | 17     | 13      | 0.76   | 8    | 8       | 1.00    | 0.75    | 0.25  |
| Tubulin beta-1 chain                                                        | IPI00006510 | 55 kDa  | 2         | 0       | 0.00  | 0    | 0       | 0.00  | 12     | 12      | 1.00   | 11   | 17      | 1.55    | 1.27    | 0.39  |
| Propionyl Coenzyme A carboxylase, alpha polypeptide                         | IPI00552081 | 17 kDa  | 0         | 3       | n/a   | 8    | 6       | 0.75  | 1      | 4       | 4.00   | 17   | 18      | 1.06    | 1.94    | 1.79  |
| Isoform 1 of Polypyrimidine tract-binding protein 1                         | IPI00179964 | 57 kDa  | 2         | 4       | 2.00  | 0    | 0       | 0.00  | 7      | 7       | 1.00   | 12   | 1       | 0.08    | 0.77    | 0.94  |
| poly(rC)-binding protein 2 isoform b                                        | IPI00012066 | 38 kDa  | 0         | 1       | n/a   | 0    | 2       | n/a   | 14     | 8       | 0.57   | 17   | 11      | 0.65    | 0.61    | 0.05  |
| Full-length cDNA 5-PRIME end of clone CS0DJ009YL13                          | IPI00384016 | 30 kDa  | 8         | 9       | 1.13  | 4    | 16      | 4.00  | 5      | 5       | 1.00   | 6    | 1       | 0.17    | 1.57    | 1.67  |
| pre-mRNA-splicing factor ATP-dependent RNA helicase DHX15                   | IPI00396435 | 91 kDa  | 3         | 1       | 0.33  | 0    | 0       | 0.00  | 16     | 5       | 0.31   | 9    | 6       | 0.67    | 0.44    | 0.20  |
| Splicing factor 3B subunit 5                                                | IPI00010404 | 10 kDa  | 9         | 12      | 1.33  | 17   | 6       | 0.35  | 5      | 3       | 0.60   | 0    | 0       | 0.00    | 0.76    | 0.51  |
| Protein BUD31 homolog                                                       | IPI00013180 | 17 kDa  | 13        | 6       | 0.46  | 9    | 7       | 0.78  | 5      | 2       | 0.40   | 1    | 1       | 1.00    | 0.66    | 0.28  |
| Isoform 1 of Putative helicase MOV-10                                       | IPI00444452 | 114 kDa | 3         | 8       | 2.67  | 0    | 1       | n/a   | 18     | 13      | 0.72   | 2    | 1       | 0.50    | 1.30    | 1.19  |
| Protein Red                                                                 | IPI00011875 | 66 kDa  | 7         | 3       | 0.43  | 5    | 2       | 0.40  | 5      | 8       | 1.60   | 6    | 8       | 1.33    | 0.94    | 0.62  |
| Complement C4-A                                                             | IPI00032258 | 193 kDa | 5         | 2       | 0.40  | 2    | 2       | 1.00  | 6      | 8       | 1.33   | 9    | 14      | 1.56    | 1.07    | 0.50  |
| Isoform 1 of GTP-binding protein 8                                          | IPI00107246 | 32 kDa  | 8         | 3       | 0.38  | 5    | 4       | 0.80  | 10     | 7       | 0.70   | 4    | 4       | 1.00    | 0.72    | 0.26  |
| Isoform 1 of Heterogeneous nuclear ribonucleoprotein D-like                 | IPI00011274 | 46 kDa  | 4         | 3       | 0.75  | 1    | 2       | 2.00  | 6      | 6       | 1.00   | 15   | 8       | 0.53    | 1.07    | 0.65  |
| Isoform 1 of U4U6 small nuclear ribonucleoprotein Prp4                      | IPI00150269 | 58 kDa  | 16        | 2       | 0.13  | 10   | 5       | 0.50  | 6      | 7       | 1.17   | 1    | 0       | 0.00    | 0.31    | 0.27  |
| Guanine nucleotide-binding protein subunit beta-2-like 1                    | IPI00848226 | 35 kDa  | 0         | 0       | 0.00  | 0    | 0       | 0.00  | 14     | 12      | 0.86   | 14   | 6       | 0.43    | 0.64    | 0.30  |
| Heterogeneous nuclear ribonucleoprotein L                                   | IPI00027834 | 64 kDa  | 0         | 1       | n/a   | 3    | 1       | 0.33  | 6      | 5       | 0.83   | 3    | 1       | 0.33    | 0.50    | 0.29  |
| RNA-binding motif protein, X-linked-like 1                                  | IPI00061178 | 42 kDa  | 3         | 3       | 1.00  | 0    | 2       | n/a   | 6      | 2       | 0.33   | 19   | 5       | 0.26    | 0.53    | 0.41  |
| Isoform 1 of DNA-binding protein A                                          | IPI00031801 | 40 kDa  | 4         | 6       | 1.50  | 3    | 2       | 0.67  | 5      | 8       | 1.60   | 9    | 5       | 0.56    | 1.08    | 0.55  |
| Isoform 2 of Spliceosome RNA helicase BAT1                                  | IPI00641829 | 51 kDa  | 4         | 6       | 1.50  | 1    | 1       | 1.00  | 4      | 5       | 1.25   | 12   | 10      | 0.83    | 1.15    | 0.29  |
| Keratin, type I cytoskeletal 24                                             | IPI00004550 | 55 kDa  | 2         | 6       | 3.00  | 8    | 10      | 1.25  | 1      | 2       | 2.00   | 5    | 8       | 1.60    | 1.96    | 0.76  |
| Isoform 2 of RISC-loading complex subunit TARBP2                            | IPI00472583 | 37 kDa  | 3         | 3       | 1.00  | 0    | 2       | n/a   | 7      | 0       | 0.00   | 15   | 10      | 0.67    | 0.83    | 0.24  |
| Pre-mRNA-splicing factor CWC22 homolog                                      | IPI00177381 | 105 kDa | 6         | 4       | 0.67  | 0    | 0       | 0.00  | 8      | 5       | 0.63   | 6    | 7       | 1.17    | 0.82    | 0.30  |
| 40S ribosomal protein S3                                                    | IPI00011253 | 27 kDa  | 1         | 0       | 0.00  | 0    | 0       | 0.00  | 10     | 6       | 0.60   | 16   | 7       | 0.44    | 0.52    | 0.11  |
| 40S ribosomal protein S4, X isoform                                         | IPI00217030 | 30 kDa  | 1         | 1       | 1.00  | 0    | 0       | 0.00  | 13     | 6       | 0.46   | 13   | 3       | 0.23    | 0.56    | 0.39  |
| Alpha-ketoglutarate dehydrogenase complex dihydrolipoyl succinyltransferase | IPI00033034 | 49 kDa  | 6         | 8       | 1.33  | 3    | 8       | 2.67  | 1      | 3       | 3.00   | 2    | 2       | 1.00    | 2.00    | 0.98  |
| Isoform 1 of Insulin-like growth factor 2 mRNA-binding protein 2            | IPI00179713 | 66 kDa  | 5         | 10      | 2.00  | 1    | 0       | 0.00  | 19     | 14      | 0.74   | 15   | 11      | 0.73    | 1.16    | 0.73  |
| Isoform 1 of ELAV-like protein 2                                            | IPI00030250 | 40 kDa  | 4         | 2       | 0.50  | 0    | 0       | 0.00  | 6      | 5       | 0.83   | 12   | 6       | 0.50    | 0.61    | 0.19  |
| Poly(rC)-binding protein 1                                                  | IPI00016610 | 37 kDa  | 0         | 1       | n/a   | 1    | 2       | 2.00  | 0      | 7       | n/a    | 13   | 14      | 1.08    | 1.54    | 0.65  |
| Protein mago nashi homolog 2                                                | IPI00059292 | 17 kDa  | 10        | 1       | 0.10  | 11   | 0       | 0.00  | 2      | 7       | 3.50   | 0    | 5       | n/a     | 0.05    | 0.07  |
| ADP/ATP translocase 2                                                       | IPI00007188 | 33 kDa  | 2         | 1       | 0.50  | 0    | 0       | 0.00  | 6      | 6       | 1.00   | 11   | 7       | 0.64    | 0.71    | 0.26  |
| Isoform Long of Acetyl-CoA carboxylase 2                                    | IPI00013003 | 277 kDa | 0         | 0       | 0.00  | 1    | 0       | 0.00  | 12     | 10      | 0.83   | 3    | 5       | 1.67    | 1.25    | 0.59  |
| Iso 1 of Methylcrotonyl-CoA carboxylase beta chain, mitochondrial           | IPI00784044 | 61 kDa  | 12        | 0       | 0.00  | 0    | 0       | 0.00  | 7      | 12      | 1.71   | 1    | 1       | 1.00    | 0.90    | 0.86  |
| Probable ATP-dependent RNA helicase DDX5                                    | IPI00017617 | 69 kDa  | 0         | 3       | n/a   | 1    | 2       | 2.00  | 8      | 3       | 0.38   | 13   | 3       | 0.23    | 0.87    | 0.98  |
| Heterogeneous nuclear ribonucleoprotein G                                   | IPI00304692 | 42 kDa  | 0         | 1       | n/a   | 0    | 0       | 0.00  | 7      | 1       | 0.14   | 19   | 5       | 0.26    | 0.20    | 0.09  |
| Pre-mRNA-splicing factor SYF2                                               | IPI00022963 | 29 kDa  | 6         | 3       | 0.50  | 0    | 5       | n/a   | 4      | 6       | 1.50   | 3    | 3       | 1.00    | 1.00    | 0.50  |
| ATP-dependent RNA helicase A                                                | IPI00844578 | 141 kDa | 3         | 2       | 0.67  | 0    | 0       | 0.00  | 10     | 5       | 0.50   | 9    | 1       | 0.11    | 0.43    | 0.29  |
| RNA-binding motif protein, X-linked-like-2                                  | IPI00004450 | 43 kDa  | 0         | 3       | n/a   | 0    | 0       | 0.00  | 5      | 4       | 0.80   | 16   | 6       | 0.38    | 0.59    | 0.30  |

**Table S1.** Peptide counts for top proteins (70-137) detected by mass spectrometry of DMSO and BN82685 streptavidin pull downs.



|                                                                         | Accession   |         | Molecular |         | Exp 1 |      | Exp 2   |       | Exp 3A |         | Exp 3B |      | Average |       | Std Dev |      |
|-------------------------------------------------------------------------|-------------|---------|-----------|---------|-------|------|---------|-------|--------|---------|--------|------|---------|-------|---------|------|
|                                                                         | Number      | Weight  | DMSO      | BN82685 | ratio | DMSO | BN82685 | ratio | DMSO   | BN82685 | ratio  | DMSO | BN82685 | ratio |         |      |
| Top 200 Identified Proteins                                             |             |         |           |         |       |      |         |       |        |         |        |      |         |       |         |      |
| Isoform 1 of Far upstream element-binding protein 3                     | IPI00377261 | 62 kDa  | 1         | 1       | 1.00  | 2    | 4       | 2.00  | 7      | 4       | 0.57   | 6    | 2       | 0.33  | 0.98    | 0.74 |
| Survival of motor neuron-related-splicing factor 30                     | IPI00025176 | 27 kDa  | 4         | 1       | 0.25  | 0    | 3       | n/a   | 7      | 8       | 1.14   | 5    | 1       | 0.20  | 0.53    | 0.53 |
| Nuclear cap-binding protein subunit 1                                   | IPI00019380 | 92 kDa  | 3         | 1       | 0.33  | 0    | 0       | 0.00  | 11     | 10      | 0.91   | 2    | 1       | 0.50  | 0.58    | 0.30 |
| Keratin, type II cytoskeletal 5                                         | IPI00009867 | 62 kDa  | 8         | 7       | 0.88  | 1    | 2       | 2.00  | 2      | 2       | 1.00   | 2    | 2       | 1.00  | 1.22    | 0.52 |
| Isoform 2 of Insulin-like growth factor 2 mRNA-binding protein 3        | IPI00165467 | 22 kDa  | 3         | 0       | 0.00  | 0    | 0       | 0.00  | 6      | 3       | 0.50   | 10   | 7       | 0.70  | 0.60    | 0.14 |
| Isoform F of Protein SON                                                | IPI00001192 | 264 kDa | 4         | 3       | 0.75  | 0    | 0       | 0.00  | 9      | 6       | 0.67   | 2    | 2       | 1.00  | 0.81    | 0.17 |
| Small nuclear ribonucleoprotein F                                       | IPI00220528 | 10 kDa  | 3         | 3       | 1.00  | 9    | 7       | 0.78  | 2      | 1       | 0.50   | 1    | 2       | 2.00  | 1.07    | 0.65 |
| Nucleolysin TIAR                                                        | IPI00005615 | 42 kDa  | 8         | 0       | 0.00  | 0    | 0       | 0.00  | 2      | 2       | 1.00   | 7    | 4       | 0.57  | 0.52    | 0.50 |
| Isoform 1 of DNA-dependent protein kinase catalytic subunit             | IPI00296337 | 469 kDa | 3         | 1       | 0.33  | 2    | 2       | 1.00  | 2      | 3       | 1.50   | 4    | 2       | 0.50  | 0.83    | 0.53 |
| Microfibrillar-associated protein 1                                     | IPI00022790 | 52 kDa  | 4         | 0       | 0.00  | 0    | 0       | 0.00  | 8      | 8       | 1.00   | 4    | 1       | 0.25  | 0.63    | 0.53 |
| Peptidyl-prolyl cis-trans isomerase H                                   | IPI00007346 | 19 kDa  | 9         | 5       | 0.56  | 5    | 1       | 0.20  | 2      | 0       | 0.00   | 0    | 0       | 0.00  | 0.38    | 0.25 |
| Small nuclear ribonucleoprotein G                                       | IPI00016572 | 8 kDa   | 7         | 7       | 1.00  | 4    | 1       | 0.25  | 0      | 1       | n/a    | 0    | 1       | n/a   | 0.63    | 0.53 |
| Isoform 1 of 60S ribosomal protein L12                                  | IPI00024933 | 18 kDa  | 1         | 2       | 2.00  | 0    | 0       | 0.00  | 10     | 4       | 0.40   | 8    | 0       | 0.00  | 0.80    | 1.06 |
| Interferon-inducible dsRNA-dependent protein kinase activator A         | IPI00021167 | 34 kDa  | 4         | 0       | 0.00  | 0    | 0       | 0.00  | 7      | 6       | 0.86   | 5    | 2       | 0.40  | 0.63    | 0.32 |
| Isoform 1 of U4U6 small nuclear ribonucleoprotein Prp3                  | IPI00005861 | 78 kDa  | 14        | 1       | 0.07  | 3    | 0       | 0.00  | 1      | 5       | 5.00   | 0    | 0       | 0.00  | 0.04    | 0.05 |
| Isoform 2 of NLR family member X1                                       | IPI00377214 | 102 kDa | 0         | 1       | n/a   | 5    | 0       | 0.00  | 0      | 0       | 0.00   | 3    | 2       | 0.67  | 0.33    | 0.47 |
| Isoform 4 of Heterogeneous nuclear ribonucleoprotein A/B                | IPI00106509 | 31 kDa  | 0         | 0       | 0.00  | 0    | 0       | 0.00  | 3      | 1       | 0.33   | 10   | 8       | 0.80  | 0.57    | 0.33 |
| A-kinase anchor protein 8                                               | IPI00014474 | 76 kDa  | 0         | 1       | 0.00  | 0    | 0       | 0.00  | 5      | 6       | 1.20   | 2    | 6       | 3.00  | 2.10    | 1.27 |
| Isoform Short of Heterogeneous nuclear ribonucleoprotein U              | IPI00479217 | 89 kDa  | 0         | 2       | n/a   | 0    | 0       | 0.00  | 6      | 7       | 1.17   | 1    | 0       | 0.00  | 1.17    | 0.00 |
| Ribosomal protein L14 variant                                           | IPI00555744 | 24 kDa  | 1         | 0       | 0.00  | 0    | 0       | 0.00  | 9      | 8       | 0.89   | 2    | 2       | 1.00  | 0.94    | 0.08 |
| Tubulin beta-2A chain                                                   | IPI00013475 | 50 kDa  | 0         | 2       | n/a   | 0    | 0       | 0.00  | 9      | 10      | 1.11   | 4    | 0       | 0.00  | 0.56    | 0.79 |
| Endoribonuclease Dicer                                                  | IPI00219036 | 219 kDa | 0         | 1       | n/a   | 0    | 0       | 0.00  | 19     | 0       | 0.00   | 2    | 0       | 0.00  | 0.00    | 0.00 |
| 60S ribosomal protein L24                                               | IPI00306332 | 18 kDa  | 5         | 1       | 0.20  | 0    | 0       | 0.00  | 4      | 5       | 1.25   | 7    | 0       | 0.00  | 0.48    | 0.67 |
| Nuclease-sensitive element-binding protein 1                            | IPI00031812 | 36 kDa  | 1         | 0       | 0.00  | 0    | 0       | 0.00  | 5      | 5       | 1.00   | 1    | 3       | 3.00  | 2.00    | 1.41 |
| Isoform 1 of Serine/arginine repetitive matrix protein 2                | IPI00782992 | 300 kDa | 7         | 7       | 1.00  | 0    | 0       | 0.00  | 4      | 2       | 0.50   | 0    | 0       | 0.00  | 0.75    | 0.35 |
| Isoform 1 of Bcl-2-associated transcription factor 1                    | IPI00006079 | 106 kDa | 0         | 0       | 0.00  | 0    | 0       | 0.00  | 7      | 12      | 1.71   | 0    | 0       | 0.00  | 1.71    | 0.00 |
| Zinc finger matrix-type protein 2                                       | IPI00069734 | 24 kDa  | 0         | 0       | 0.00  | 1    | 0       | 0.00  | 6      | 8       | 1.33   | 1    | 1       | 1.00  | 1.17    | 0.24 |
| Interleukin enhancer-binding factor 2                                   | IPI00005198 | 43 kDa  | 1         | 1       | 1.00  | 0    | 0       | 0.00  | 9      | 0       | 0.00   | 7    | 1       | 0.14  | 0.38    | 0.54 |
| Superkiller viralicidal activity 2-like 2                               | IPI00647217 | 118 kDa | 0         | 0       | 0.00  | 0    | 0       | 0.00  | 6      | 6       | 1.00   | 3    | 3       | 1.00  | 1.00    | 0.00 |
| NHP2-like protein 1                                                     | IPI00026167 | 14 kDa  | 7         | 3       | 0.43  | 7    | 0       | 0.00  | 0      | 0       | 0.00   | 0    | 0       | 0.00  | 0.21    | 0.30 |
| 60S ribosomal protein L13a                                              | IPI00304612 | 24 kDa  | 0         | 0       | 0.00  | 0    | 0       | 0.00  | 10     | 6       | 0.60   | 0    | 0       | 0.00  | 0.60    | 0.00 |
| Pyruvate dehydrogenase E1 component subunit alpha, testis-specific      | IPI00024087 | 43 kDa  | 2         | 0       | 0.00  | 1    | 6       | 6.00  | 0      | 2       | n/a    | 1    | 5       | 5.00  | 5.50    | 0.71 |
| Isoform ASF-1 of Splicing factor, arginine/serine-rich 1                | IPI00215884 | 28 kDa  | 0         | 0       | 0.00  | 0    | 0       | 0.00  | 6      | 6       | 1.00   | 3    | 1       | 0.33  | 0.67    | 0.47 |
| Iso 2 of Serine/threonine-protein phosphatase PGAM 5, mitochondrial     | IPI00063242 | 28 kDa  | 0         | 0       | 0.00  | 0    | 0       | 0.00  | 10     | 4       | 0.40   | 5    | 0       | 0.00  | 0.20    | 0.28 |
| Isoform 1 of Clathrin heavy chain 1                                     | IPI00024067 | 192 kDa | 0         | 0       | 0.00  | 0    | 0       | 0.00  | 4      | 1       | 0.25   | 0    | 0       | 0.00  | 1.00    | 0.00 |
| DEAH (Asp-Glu-Ala-His) box polypeptide 16                               | IPI00292510 | 63 kDa  | 4         | 2       | 0.50  | 0    | 0       | 0.00  | 7      | 1       | 0.14   | 2    | 1       | 0.50  | 0.38    | 0.21 |
| Propionyl Coenzyme A carboxylase, alpha polypeptide                     | IPI00553241 | 13 kDa  | 0         | 0       | 0.00  | 1    | 3       | 3.00  | 1      | 2       | 2.00   | 5    | 5       | 1.00  | 2.00    | 1.00 |
| 40S ribosomal protein S11                                               | IPI00025091 | 18 kDa  | 1         | 1       | 1.00  | 0    | 0       | 0.00  | 3      | 2       | 0.67   | 6    | 0       | 0.00  | 0.56    | 0.51 |
| Isoform 2 of Heterogeneous nuclear ribonucleoprotein A/B                | IPI00334587 | 36 kDa  | 0         | 0       | 0.00  | 0    | 0       | 0.00  | 5      | 3       | 0.60   | 5    | 1       | 0.00  | 0.40    | 0.49 |
| 60S ribosomal protein L21                                               | IPI00247583 | 19 kDa  | 1         | 0       | 0.00  | 0    | 0       | 0.00  | 2      | 2       | 1.00   | 6    | 2       | 0.33  | 0.67    | 0.47 |
| Isoform 1 of RNA-binding protein 8A                                     | IPI00001757 | 20 kDa  | 4         | 0       | 0.00  | 1    | 0       | 0.00  | 2      | 3       | 1.50   | 0    | 2       | n/a   | 0.75    | 1.06 |
| Polymerase delta interacting protein 46                                 | IPI00429180 | 20 kDa  | 0         | 0       | 0.00  | 0    | 0       | 0.00  | 4      | 3       | 0.75   | 2    | 5       | 2.50  | 1.62    | 1.24 |
| 40S ribosomal protein S8                                                | IPI00216587 | 24 kDa  | 0         | 0       | 0.00  | 0    | 0       | 0.00  | 5      | 6       | 1.20   | 4    | 0       | 0.00  | 0.60    | 0.85 |
| Elongation factor 1-alpha 2                                             | IPI00014424 | 50 kDa  | 4         | 5       | 1.25  | 1    | 1       | 1.00  | 2      | 2       | 1.00   | 0    | 0       | 0.00  | 1.08    | 0.14 |
| 40S ribosomal protein S15a                                              | IPI00221091 | 15 kDa  | 1         | 1       | 1.00  | 1    | 0       | 0.00  | 8      | 3       | 0.38   | 1    | 0       | 0.00  | 0.69    | 0.44 |
| Isoform 1 of Peptidyl-prolyl cis-trans isomerase CWC27 homolog          | IPI00025174 | 54 kDa  | 4         | 3       | 0.75  | 2    | 0       | 0.00  | 2      | 5       | 2.50   | 0    | 0       | 0.00  | 1.62    | 1.24 |
| Isoform 4 of Dynein heavy chain 6, axonemal                             | IPI00884959 | 290 kDa | 0         | 0       | 0.00  | 5    | 5       | 1.00  | 1      | 2       | 2.00   | 0    | 0       | 0.00  | 1.50    | 0.71 |
| cDNA FLJ54030, highly similar to Polymerase delta-interacting protein 3 | IPI00440688 | 48 kDa  | 0         | 0       | 0.00  | 0    | 0       | 0.00  | 5      | 11      | 2.20   | 0    | 0       | 0.00  | 2.20    | 0.00 |
| Isoform 3 of Probable ATP-dependent RNA helicase DDX17                  | IPI00651653 | 73 kDa  | 1         | 1       | 1.00  | 0    | 0       | 0.00  | 6      | 4       | 0.67   | 2    | 1       | 0.50  | 0.72    | 0.25 |
| Isoform 1 of Peptidyl-prolyl cis-trans isomerase-like 2                 | IPI00003824 | 59 kDa  | 2         | 0       | 0.00  | 0    | 0       | 0.00  | 3      | 5       | 1.67   | 1    | 1       | 1.00  | 1.33    | 0.47 |
| Protein DGCR14                                                          | IPI00165171 | 53 kDa  | 0         | 0       | 0.00  | 0    | 0       | 0.00  | 3      | 9       | 3.00   | 0    | 0       | 0.00  | 3.00    | 0.00 |
| Putative uncharacterized protein ENSP00000382160                        | IPI00180956 | 49 kDa  | 1         | 3       | 3.00  | 1    | 1       | 1.00  | 2      | 1       | 0.50   | 0    | 4       | n/a   | 1.50    | 1.32 |
| Targeting protein for Xklp2                                             | IPI00008477 | 86 kDa  | 2         | 1       | 0.50  | 0    | 0       | 0.00  | 4      | 3       | 0.75   | 2    | 1       | 0.50  | 0.58    | 0.14 |
| WD repeat domain 57 (U5 snRNP specific), isoform CRA_b                  | IPI00385642 | 14 kDa  | 3         | 0       | 0.00  | 0    | 0       | 0.00  | 2      | 5       | 2.50   | 1    | 0       | 0.00  | 1.25    | 1.77 |
| HLA-B associated transcript 1                                           | IPI00641634 | 26 kDa  | 0         | 0       | 0.00  | 0    | 0       | 0.00  | 2      | 2       | 1.00   | 5    | 5       | 1.00  | 1.00    | 0.00 |
| TDP43                                                                   | IPI00025815 | 45 kDa  | 1         | 1       | 1.00  | 0    | 0       | 0.00  | 2      | 4       | 2.00   | 2    | 2       | 1.00  | 1.33    | 0.58 |
| U6 snRNA-associated Sm-like protein LSm3                                | IPI00219229 | 12 kDa  | 3         | 0       | 0.00  | 5    | 2       | 0.40  | 1      | 1       | 1.00   | 0    | 0       | 0.00  | 0.46    | 0.50 |
| U4U6.U5 tri-snRNP-associated protein 1                                  | IPI00021417 | 90 kDa  | 8         | 1       | 0.13  | 1    | 1       | 1.00  | 0      | 1       | n/a    | 0    | 0       | 0.00  | 0.56    | 0.62 |
| Isoform 1 of Heterogeneous nuclear ribonucleoprotein A3                 | IPI00419373 | 40 kDa  | 0         | 2       | n/a   | 0    | 0       | 0.00  | 3      | 1       | 0.33   | 6    | 0       | 0.00  | 0.17    | 0.24 |
| ATP-dependent RNA helicase DHX8                                         | IPI00031508 | 139 kDa | 0         | 1       | n/a   | 1    | 0       | 0.00  | 0      | 5       | n/a    | 1    | 3       | 3.00  | 3.00    | 0.00 |
| Isoform 3 of PCI domain-containing protein 2                            | IPI00072541 | 43 kDa  | 3         | 1       | 0.33  | 0    | 0       | 0.00  | 1      | 3       | 3.00   | 2    | 0       | 0.00  | 1.66    | 1.89 |
| 32 kDa protein                                                          | IPI00399077 | 32 kDa  | 0         | 0       | 0.00  | 0    | 0       | 0.00  | 3      | 3       | 1.00   | 5    | 1       | 0.20  | 0.60    | 0.57 |
| HSPA5 protein                                                           | IPI00003362 | 72 kDa  | 5         | 3       | 0.60  | 1    | 1       | 1.00  | 0      | 0       | 0.00   | 0    | 0       | 0.00  | 0.80    | 0.28 |
| 33 kDa protein                                                          | IPI00413108 | 33 kDa  | 0         | 0       | 0.00  | 0    | 0       | 0.00  | 5      | 2       | 0.40   | 5    | 0       | 0.00  | 0.20    | 0.28 |
| Protein CA5C3                                                           | IPI00289491 | 76 kDa  | 0         | 0       | 0.00  | 0    | 0       | 0.00  | 0      | 8       | n/a    | 0    | 3       | n/a   | 0.00    | 0.00 |
| Isoform 1 of Heterogeneous nuclear ribonucleoprotein D0                 | IPI00028888 | 38 kDa  | 0         | 0       | 0.00  | 0    | 0       | 0.00  | 4      | 5       | 1.25   | 9    | 5       | 0.56  | 0.90    | 0.49 |
| Splicing factor, arginine/serine-rich 9                                 | IPI00012340 | 26 kDa  | 0         | 0       | 0.00  | 0    | 0       | 0.00  | 6      | 1       | 0.17   | 2    | 0       | 0.00  | 0.17    | 0.00 |
| Isoform 1 of Splicing factor U2AF 65 kDa subunit                        | IPI00031556 | 54 kDa  | 2         | 0       | 0.00  | 0    | 0       | 0.00  | 7      | 1       | 0.14   | 0    | 0       | 0.00  | 0.14    | 0.00 |

**Table S1.** Peptide counts for top proteins (138-203) detected by mass spectrometry of DMSO and BN82685 streptavidin pull downs.

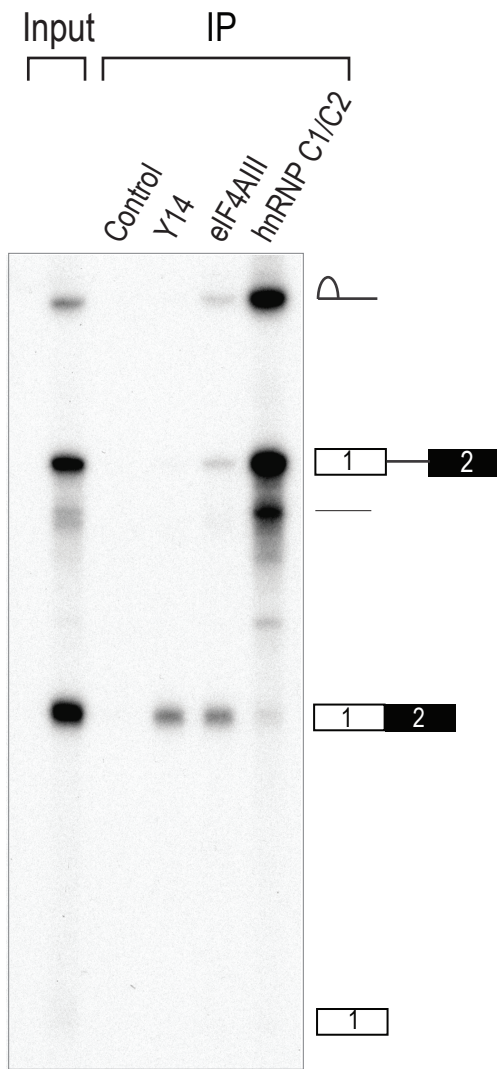

Berg et al. Figure S1

A

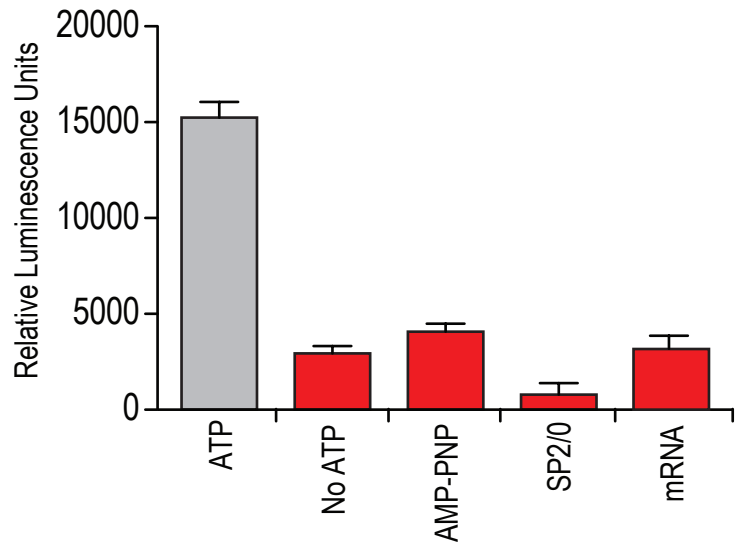

B

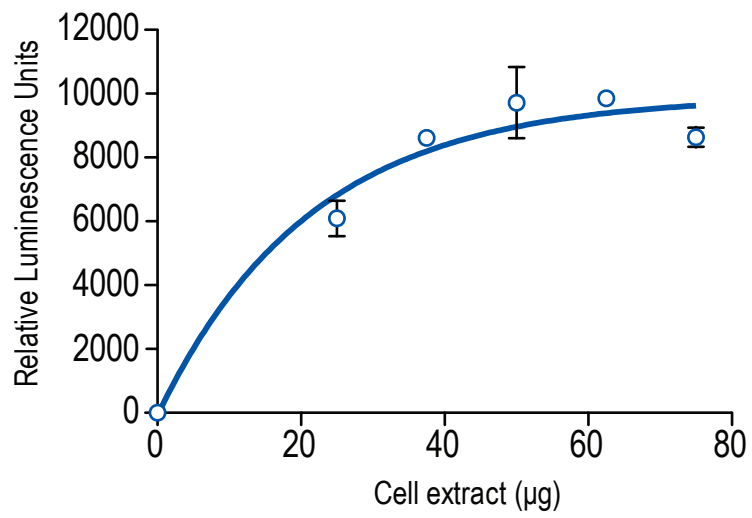

C

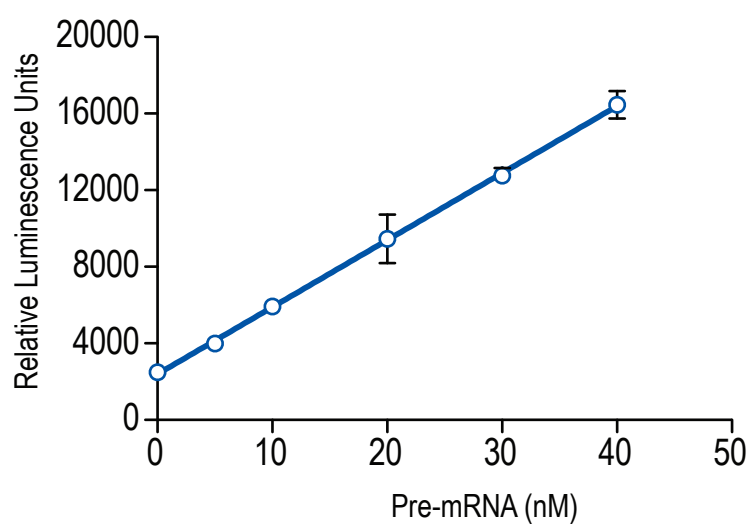

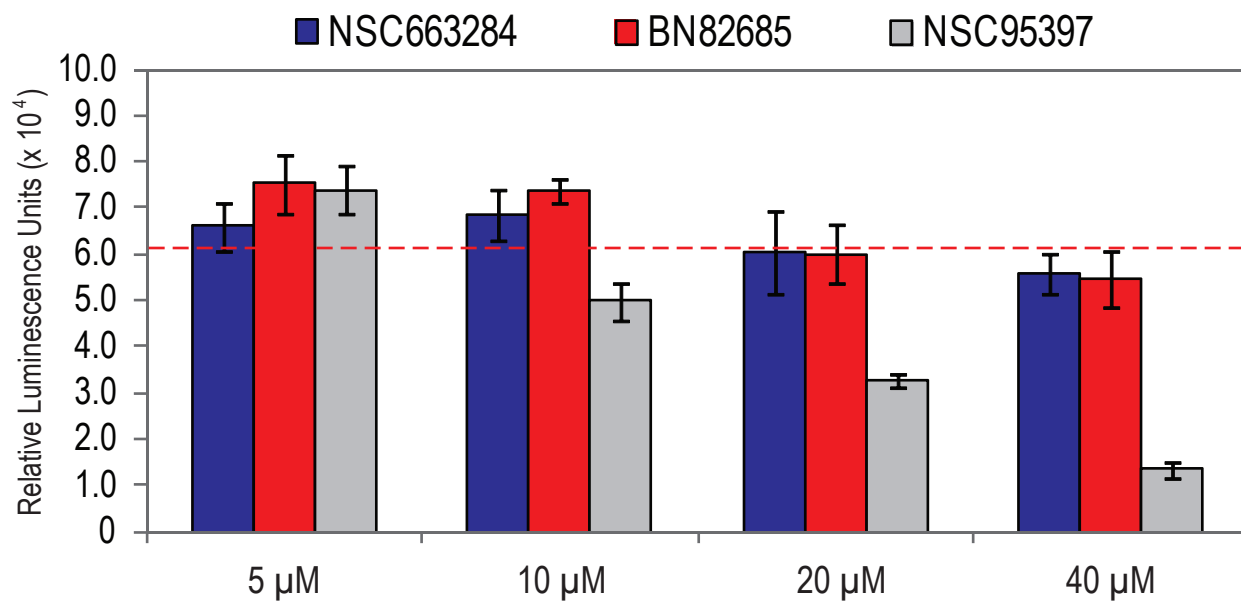

Berg et al. Figure S3
